# Supplementary material
Source: PubMed Central journal article supplement (PMC3361892)
Supplement: NIHMS377744-supplement-Table_S1.pdf [file NIHMS377744-supplement-Table_S1.pdf]

Table S1. BAC clones used for FISH analysis.

| <b>BAC clones</b> | <b>location</b> | <b>gene<br/>relevance</b> | <b>GP starting(bp)</b> | <b>GP ending(bp)</b> |
|-------------------|-----------------|---------------------------|------------------------|----------------------|
| RP11-1011D5       | 1p22.2          | T-TGFBR3                  | 91558274               | 91762571             |
| RP11-135F24       | 1p22.2          | T-TGFBR3                  | 91761146               | 91916480             |
| RP11-43G6         | 1p22.2-1p22.1   | T-TGFBR3                  | 91927006               | 92116949             |
| RP11-77A10        | 1p22.1          | C-TGFBR3                  | 92338785               | 92535404             |
| RP11-28O2         | 1p22.1          | C-TGFBR3                  | 92527303               | 92676773             |
| RP11-163M2        | 1p22.1          | C-TGFBR3                  | 92672616               | 92863188             |
| RP11-119O18       | 10q24.31-24.32  | C-MGEA5                   | 102998931              | 103192356            |
| RP11-1126B16      | 10q24.32        | C-MGEA5                   | 103179258              | 103328446            |
| RP11-958B14       | 10q24.32        | C-MGEA5                   | 103310522              | 103532189            |
| RP11-1094L10      | 10q24.32        | T-MGEA5                   | 103634917              | 103819972            |
| RP11-299C16       | 10q24.32        | T-MGEA5                   | 103820004              | 104020895            |
| RP11-346A7        | 10q24.32        | T-MGEA5                   | 104019613              | 104203792            |
| RP11-81P15        | 3p12.1          | VGLL3                     | 86961846               | 87141058             |
| RP11-806P24       | 3p22.3          | GLB1/CRTAP                | 33052014               | 33256233             |
